# Supplementary material for: Mitochondrial Functionality Is Regulated by Alkylphospholipids in Human Colon Cancer Cells
Source: MDPI journal article supplement (doi:10.3390/biology12121457), 2023-11-22
Supplement: s1 [file s1]

## Blot - OXPHOS complexes (Figure 3)

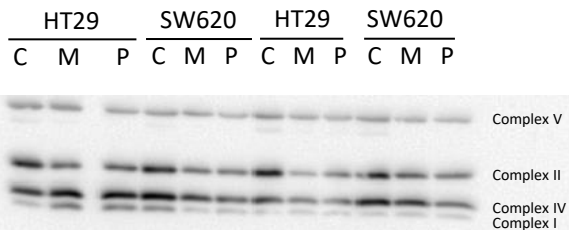

*C: vehicle-treated cells*  
*M: miltefosine-treated cells*  
*P: perifosine-treated cells*

*3 gels blotted into the same membrane. All gels follow the same order.*

# **Blot - OXPHOS complexes (Figure 3)** **Further exposition for Complex III**

| HT29 |   |   | SW620 |   |   | HT29 |   |   | SW620 |   |   |
|------|---|---|-------|---|---|------|---|---|-------|---|---|
| C    | M | P | C     | M | P | C    | M | P | C     | M | P |

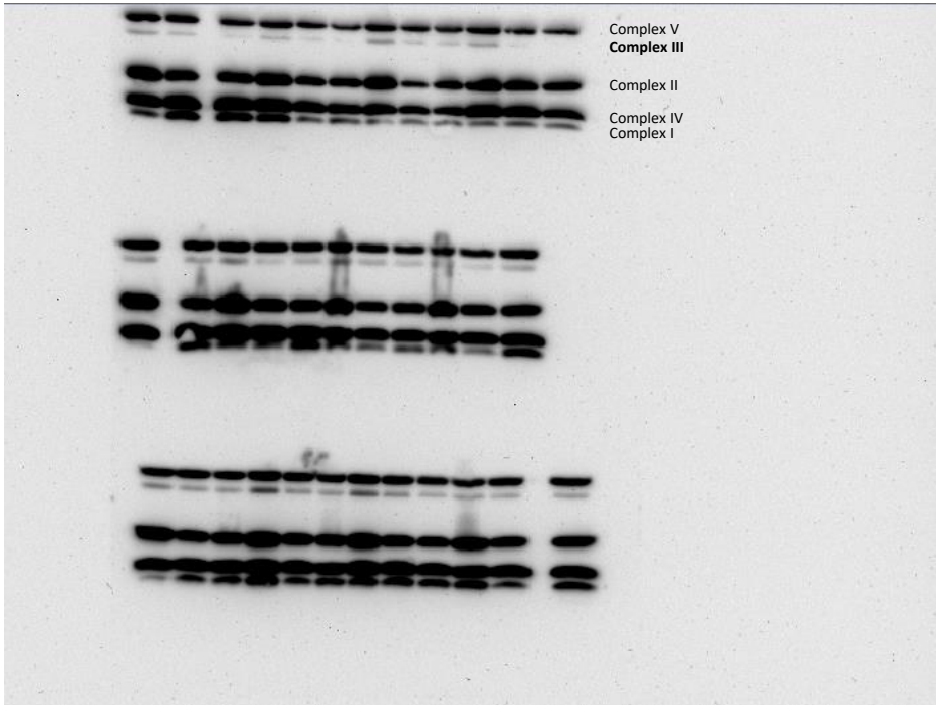

*C: vehicle-treated cells*  
*M: miltefosine-treated cells*  
*P: perifosine-treated cells*

*3 gels blotted into the same membrane. All gels follow the same order.*

## Blot - GAPDH complexes (Figure 3)

| HT29 |   |   | SW620 |   |   | HT29 |   |   | SW620 |   |   |
|------|---|---|-------|---|---|------|---|---|-------|---|---|
| C    | M | P | C     | M | P | C    | M | P | C     | M | P |

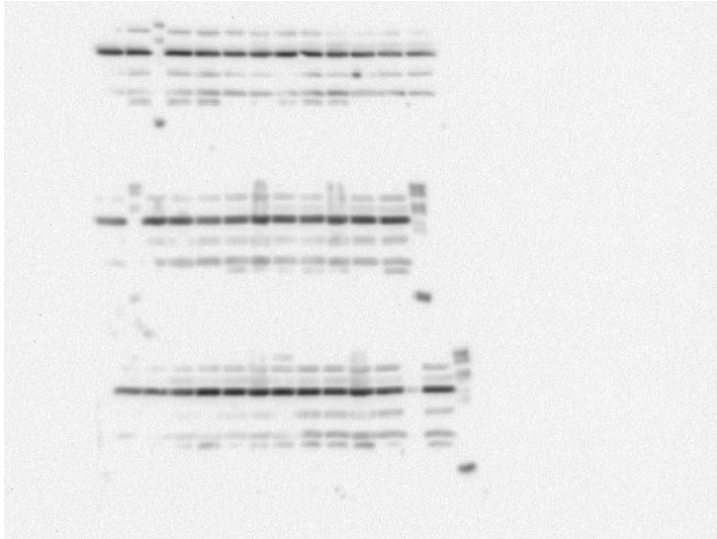

*C: vehicle-treated cells*  
*M: miltefosine-treated cells*  
*P: perifosine-treated cells*

*3 gels blotted into the same membrane. All gels follow the same order.*  
*NOTE: This blot was performed after stripping of OXPHOS membrane.*

## Blot – PDH (Figure 4)

| HT29 |   | SW620 |   | HT29 |   | SW620 |   | HT29 |   | SW620 |   |
|------|---|-------|---|------|---|-------|---|------|---|-------|---|
| C    | P | C     | P | C    | P | C     | P | C    | P | C     | P |

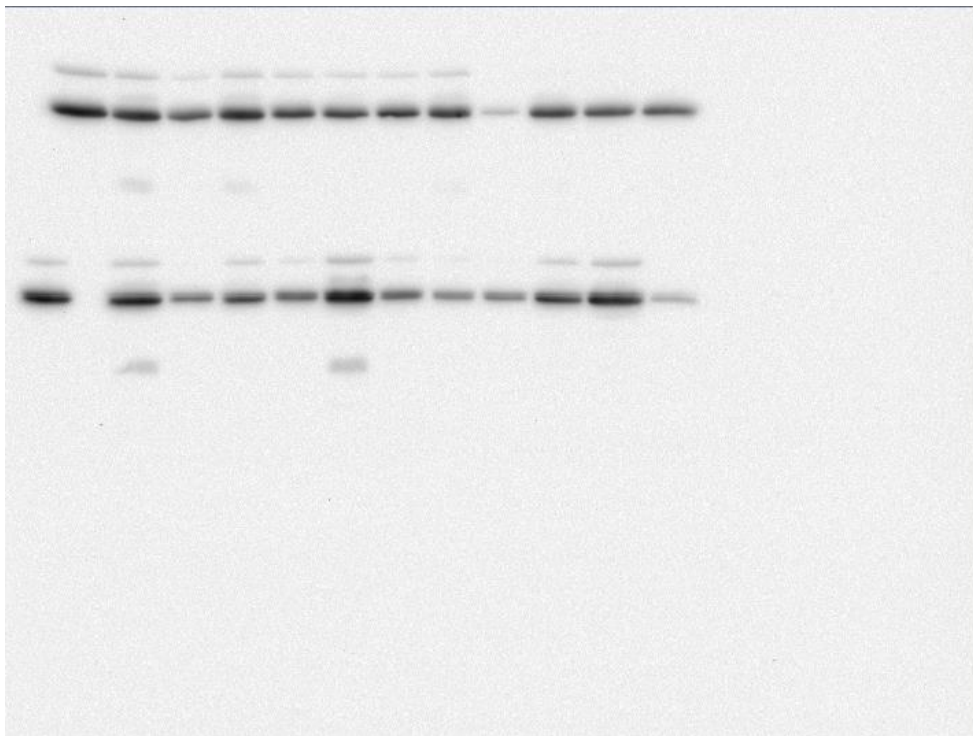

*C: vehicle-treated cells*  
*P: perifosine-treated cells*

*2 gels blotted into the same membrane. All gels follow the same order.*

## Blot – IDH (Figure 4)

| HT29 |   | SW620 |   | HT29 |   | SW620 |   | HT29 |   | SW620 |   |
|------|---|-------|---|------|---|-------|---|------|---|-------|---|
| C    | P | C     | P | C    | P | C     | P | C    | P | C     | P |

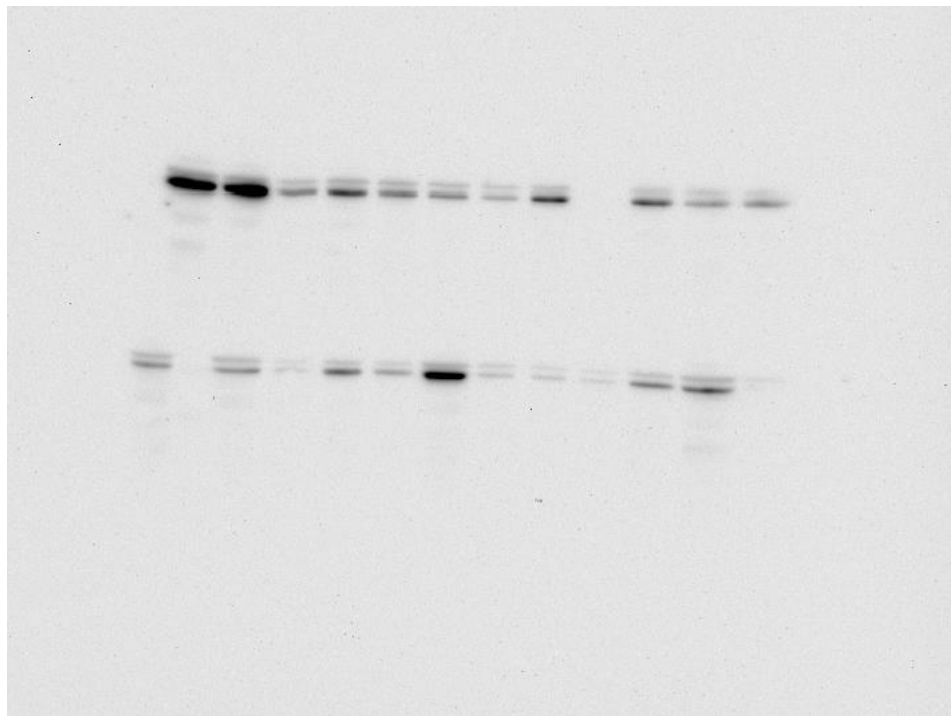

*C: vehicle-treated cells*  
*P: perifosine-treated cells*

*2 gels blotted into the same membrane. All gels follow the same order.*

## Blot – UCP2 (Figure 4)

| HT29 |   | SW620 |   | HT29 |   | SW620 |   | HT29 |   | SW620 |   |
|------|---|-------|---|------|---|-------|---|------|---|-------|---|
| C    | P | C     | P | C    | P | C     | P | C    | P | C     | P |

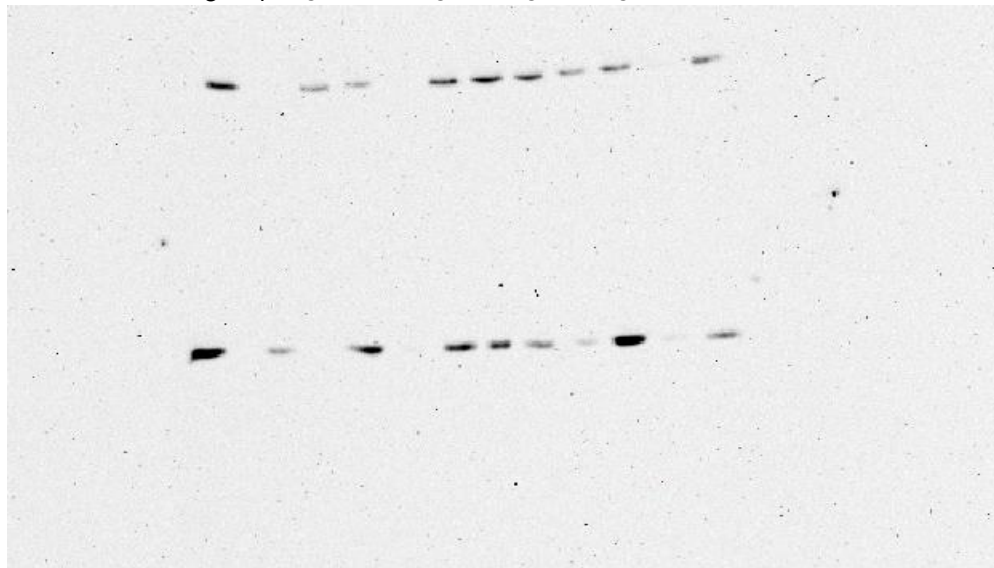

*C: vehicle-treated cells*  
*P: perifosine-treated cells*

*2 gels blotted into the same membrane. All gels follow the same order.*

## Blot – GAPDH (Figures 4 and 6)

| HT29 |   | SW620 |   | HT29 |   | SW620 |   | HT29 |   | SW620 |   |
|------|---|-------|---|------|---|-------|---|------|---|-------|---|
| C    | P | C     | P | C    | P | C     | P | C    | P | C     | P |

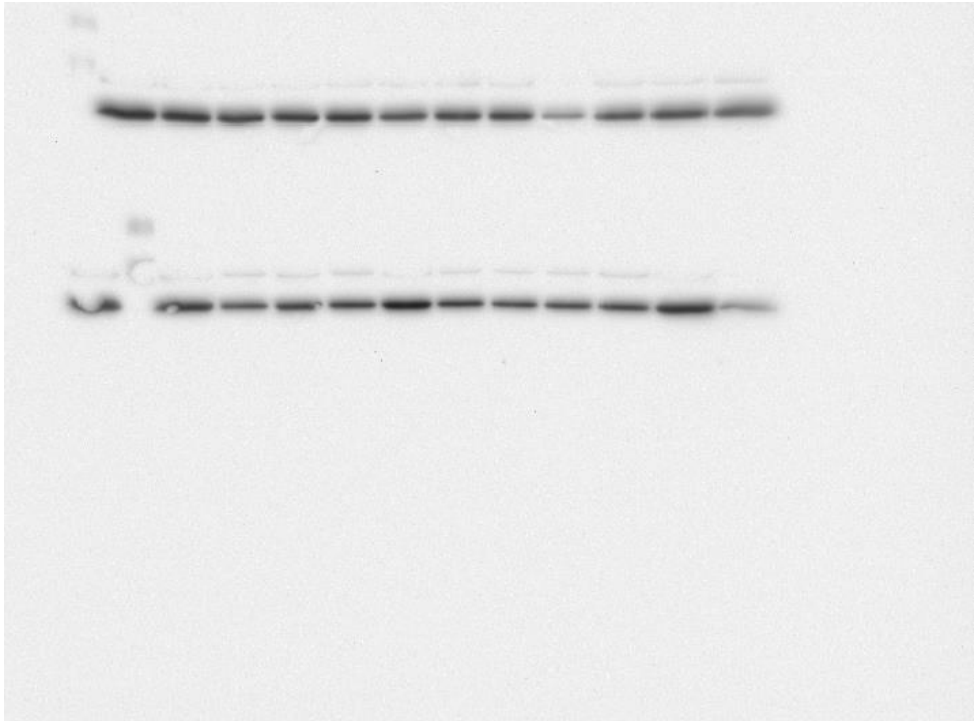

*C: vehicle-treated cells*  
*P: perifosine-treated cells*

*2 gels blotted into the same membrane. All gels follow the same order.*

## Blot – PARP (Figure 6)

| HT29 |   | SW620 |   | HT29 |   | SW620 |   | HT29 |   | SW620 |   |
|------|---|-------|---|------|---|-------|---|------|---|-------|---|
| C    | P | C     | P | C    | P | C     | P | C    | P | C     | P |

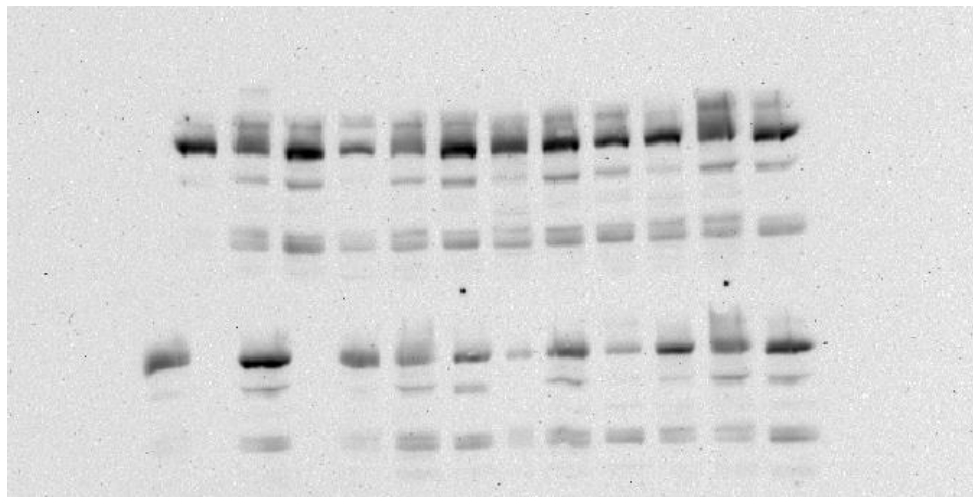

*C: vehicle-treated cells*  
*P: perifosine-treated cells*

*2 gels blotted into the same membrane. All gels follow the same order.*



## Blot – LC3 (Figure 6)

| HT29 |   | SW620 |   | HT29 |   | SW620 |   | HT29 |   | SW620 |   |
|------|---|-------|---|------|---|-------|---|------|---|-------|---|
| C    | P | C     | P | C    | P | C     | P | C    | P | C     | P |

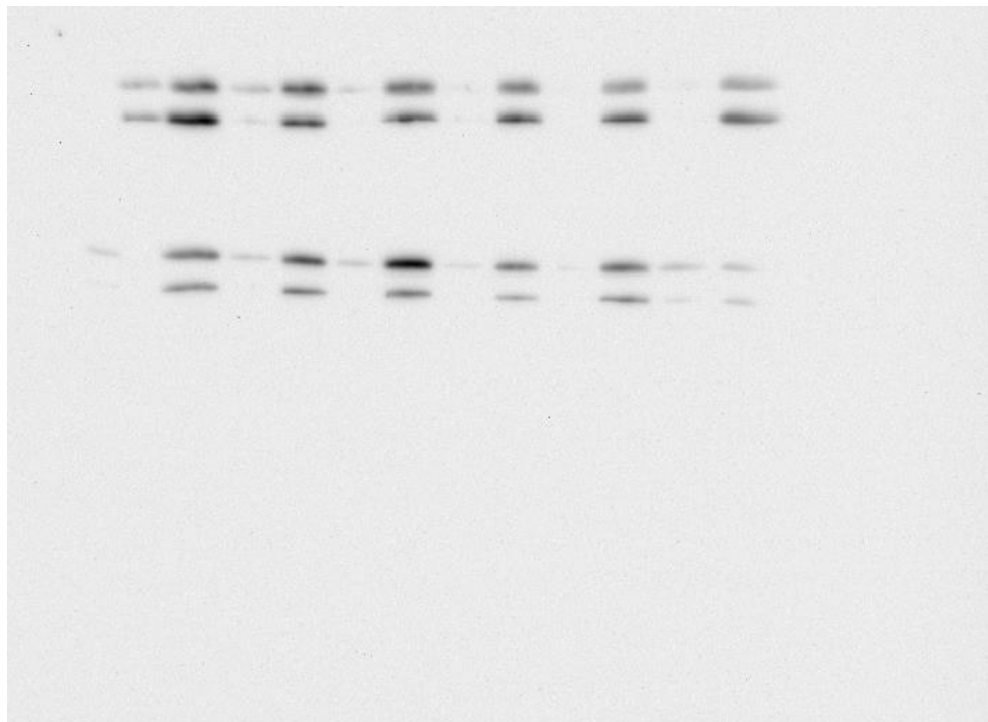

*C: vehicle-treated cells*  
*P: perifosine-treated cells*

*2 gels blotted into the same membrane. All gels follow the same order.*
